# Supplementary material
Source: Research Square preprint supplement (doi:10.21203/rs.3.rs-8872917/v1)
Supplement: Supplementary file 1 [file b235b2b490bd2554df4a8a6b.docx]

**Appendix A**

| Summary of Mixed-effect Model Results (reference levels: post-training task condition and self-directed training group) | | | | | |
| --- | --- | --- | --- | --- | --- |
| Dependent Variable | | Fixed Effects (β, t-value) | | | |
| Intercept | Condition | Group | Condition: Task |
| Performance Metrics | Average Looping Time | 60.67 (13.59)*** | -14.1 (-5.78) | 2.39  (0.54) | 15.34  (4.43)*** |
| Number of Needle Drops | 2.96 (5.84)*** | 1.03 (4.89)*** | 0.11 (0.22) | 0.15 (0.67) |
| Average Needle Positioning | 30.08 (6.78)*** | -14.17 (-3.51)** | -7.08 (-1.63) | 11.18  (2.82)* |
| Average Knot Tying Time | 84.15 (14.32)*** | -21.93 (-3.94)** | 5.87 (1.87) | 10.46 (1.88)v |
| Instrument Collision Frequency | 3.06 (3.96)*** | 0.63 (1.92) | 0.02 (0.16) | 0.25 (1.31) |
| Knot Tying Count | 2.46 (6.52)*** | -0.72 (-2.85) | -0.34 (-0.91) | 0.28 (1.11) |
| Physiological Metrics | Average Theta | 10.59 (33.79) *** | 0.07 (1.52) | 0.61 (1.93) | 0.33 (7.06) *** |
| Average Alpha | 11.26 (28.05) *** | 2.08 (41.73) *** | 0.30 (0.74) | -0.52 (-11.88) *** |
| Average Fixation Count | 14.65 (12.09) *** | -1.66 (-13.85) *** | 0.43 (0.35) | -0.04 (-0.31) |
| Pupil Diameter | 5.21 (35.22) *** | 0.0137 (1.46) | 0.0673 (0.46) | 0.013 (0.64) |
| Average Fixation Duration | 29.23 (16.61) *** | -1.34 (-3.28) ** | -2.34 (-1.33) | 1.08 (3.28) ** |

Significance thresholds: * p < .05, ** p < .01, *** p < .001.
